# Supplementary material for: Transcriptomic and Metabolomic Changes Triggered by Macrosiphum Rosivorum in Rose (Rosa longicuspis)
Source: Research Square preprint supplement (doi:10.21203/rs.3.rs-828971/v1), 2021-09-01
Supplement: Supplementary file 2 [file e5a6cbced6c2a094c5a1241a.xlsx]

## Sheet: Sheet1
Sample	CleanData(%)	BF_Q20(%)	Total_Mapped(%)	exon
A3d-1	5709263828	5613371264 (97.55%)	32929646 (86.12%)	30119965 (91.47%)
A3d-2	6252590789	6039965886 (95.45%)	34415797 (82.12%)	31705340 (92.12%)
A3d-3	7424523659	7171675378 (95.54%)	41795293 (84.25%)	38609399 (92.38%)
A5d-1	6021424639	5810489290 (95.49%)	33717429 (83.83%)	31213988 (92.58%)
A5d-2	7001816266	6764504925 (95.63%)	39192505 (83.77%)	36149105 (92.23%)
A5d-3	5747806639	5573294937 (96.05%)	32549113 (85.11%)	30043544 (92.30%)
CK-1	6728373344	6477039766 (95.31%)	37190787 (82.85%)	34210757 (91.99%)
CK-2	6411928381	6185203647 (95.49%)	35421880 (83.25%)	32119043 (90.68%)
CK-3	6930735083	6747417830 (96.36%)	39361861 (84.98%)	36379488 (92.42%)
