# Supplementary material for: Transcriptomic and Metabolomic Changes Triggered by Macrosiphum Rosivorum in Rose (Rosa longicuspis)
Source: Research Square preprint supplement (doi:10.21203/rs.3.rs-828971/v1), 2021-09-01
Supplement: Supplementary file 3 [file c8b2a3a5ccd3bc4d644ba615.xlsx]

## Sheet: Sheet1
Index	Group
pme3033	Amino acids and derivatives
pme3017	Amino acids and derivatives
pme0010	Amino acids and derivatives
pme2122	Amino acids and derivatives
pme0006	Amino acids and derivatives
pme3193	Amino acids and derivatives
mws0256	Amino acids and derivatives
pme0120	Amino acids and derivatives
mws0230	Amino acids and derivatives
Rfmb319	Amino acids and derivatives
mws1587	Amino acids and derivatives
mws0258	Amino acids and derivatives
mws0001	Amino acids and derivatives
mws0219	Amino acids and derivatives
pme0057	Amino acids and derivatives
pme1002	Amino acids and derivatives
Rfmb320	Amino acids and derivatives
pme0193	Amino acids and derivatives
pme0026	Amino acids and derivatives
mws1050	Amino acids and derivatives
pme0014	Amino acids and derivatives
pme1210	Amino acids and derivatives
mws0254	Amino acids and derivatives
mws1550	Amino acids and derivatives
pme3382	Amino acids and derivatives
pme2914	Amino acids and derivatives
pme1419	Amino acids and derivatives
pme2617	Amino acids and derivatives
pme0021	Amino acids and derivatives
pme0181	Amino acids and derivatives
mws1401	Amino acids and derivatives
mws0260	Amino acids and derivatives
pme2559	Amino acids and derivatives
pme0008	Amino acids and derivatives
mws0250	Amino acids and derivatives
pme2602	Amino acids and derivatives
pme0137	Amino acids and derivatives
pme0122	Amino acids and derivatives
pme3388	Amino acids and derivatives
Zmjp000182	Amino acids and derivatives
pme0075	Amino acids and derivatives
mws0193	Amino acids and derivatives
pme0278	Amino acids and derivatives
pme3827	Amino acids and derivatives
mws0282	Amino acids and derivatives
Zmgn002106	Amino acids and derivatives
pme0170	Amino acids and derivatives
pme1228	Amino acids and derivatives
mws0520	Amino acids and derivatives
mws0221	Amino acids and derivatives
pmb2591	Amino acids and derivatives
pme2890	Amino acids and derivatives
mws0582	Amino acids and derivatives
pme1286	Amino acids and derivatives
mws4134	Amino acids and derivatives
mws1629	Terpenoids
Zmsp002553	Terpenoids
Lmdp002381	Monoterpenoids
mws1565	Monoterpenoids
pme3217	Chalcones
pme2960	Chalcones
Zmpn002440	Chalcones
pmp000384	Chalcones
mws2118	Chalcones
Hmpn005101	Chalcones
pmp000393	Chalcones
Lmlp007435	Chalcones
Zmhn003269	Anthraquinone
pmn001343	Anthraquinone
Zmhn002464	Anthraquinone
pme0376	Dihydroflavone
pme3475	Dihydroflavone
pmp000383	Dihydroflavone
pmp000392	Dihydroflavone
mws0791	Dihydroflavone
mws1094	Dihydroflavonol
mws0044	Dihydroflavonol
mws1361	Dihydroflavonol
Lmlp005236	Dihydroflavonol
Lmgn003755	Dihydroisoflavone
pme3459	Ditepenoids
Lmmp002080	Phenolamine
Lmlp003161	Phenolamine
pmb0069	Phenolic acids
Lmbn001930	Phenolic acids
pmp001086	Phenolic acids
Lmbn001981	Phenolic acids
Hmgn001653	Phenolic acids
Lmgn001670	Phenolic acids
pmp001285	Phenolic acids
mws2213	Phenolic acids
mws0885	Phenolic acids
mws0180	Phenolic acids
pmf0440	Phenolic acids
pme1439	Phenolic acids
pmb0142	Phenolic acids
Lmbn002648	Phenolic acids
pme3083	Phenolic acids
pme0281	Phenolic acids
mws0467	Phenolic acids
Lmdp003146	Phenolic acids
pme1292	Phenolic acids
mws1500	Phenolic acids
mws1195	Phenolic acids
mws2212	Phenolic acids
mws0093	Phenolic acids
Hmtn001288	Phenolic acids
HJN037	Phenolic acids
Lmdn003756	Phenolic acids
mws0014	Phenolic acids
Lmln010063	Phenolic acids
pme3443	Phenolic acids
mws1212	Phenolic acids
mws2105	Phenolic acids
mws1297	Phenolic acids
Lmlp012720	Phenolic acids
Lmhn002926	Phenolic acids
Lmhn003223	Phenolic acids
mws2120	Phenolic acids
Lmhn102068	Phenolic acids
Lmhn001386	Phenolic acids
Zmhn001926	Phenolic acids
Zmhn001358	Phenolic acids
pmb3142	Phenolic acids
Lmhn003074	Phenolic acids
Lmhn001477	Phenolic acids
Cmzp002057	Phenolic acids
pmn001367	Phenolic acids
pmb2871	Phenolic acids
Hmtn001120	Phenolic acids
pmb0751	Phenolic acids
pmn001516	Phenolic acids
pmn001515	Phenolic acids
Lmhn002140	Phenolic acids
Zmdn001863	Phenolic acids
pmn001419	Phenolic acids
Zmhn002301	Phenolic acids
pmn001690	Phenolic acids
Lmtn002565	Phenolic acids
pmn001517	Phenolic acids
Zmhn001703	Phenolic acids
pmn001518	Phenolic acids
Zmhn005413	Phenolic acids
Hmln002806	Phenolic acids
pmb3074	Phenolic acids
pma6460	Phenolic acids
pmn001421	Phenolic acids
pmn001420	Phenolic acids
mws0906	Phenolic acids
Zmln000899	Phenolic acids
Lmmn000774	Phenolic acids
Lmtn000940	Phenolic acids
pmp000261	Phenolic acids
mws2108	Phenolic acids
pme1816	Phenolic acids
mws0178	Phenolic acids
pmn001620	Phenolic acids
Zmhn002422	Phenolic acids
Zmhn003082	Phenolic acids
pmb3107	Phenolic acids
pma3724	Phenolic acids
Lmtn003598	Phenolic acids
pmb3317	Phenolic acids
pmn001695	Phenolic acids
mws0011	Phenolic acids
pmb0108	Phenolic acids
Zmhn002227	Phenolic acids
HJN003	Phenolic acids
Lmzn001582	Phenolic acids
Hmjn003484	Phenolic acids
Cmjn004337	Phenolic acids
Lmtp003575	Phenolic acids
Lmhn004093	Phenolic acids
Zmhn003030	Phenolic acids
pmn001521	Phenolic acids
Hmbp006861	Phenolic acids
Zmhn002909	Phenolic acids
Zmhn002690	Phenolic acids
HJN093	Phenolic acids
mad2085	Phenolic acids
Zmhn003625	Phenolic acids
pmb2654	Phenolic acids
Zmhn002750	Phenolic acids
Zmhn002508	Phenolic acids
Zmhn004909	Phenolic acids
Lmnn002886	Phenolic acids
pmn001525	Phenolic acids
pmn001526	Phenolic acids
pmn001707	Phenolic acids
pmn001527	Phenolic acids
Zmln000668	Phenolic acids
Zmhn003297	Phenolic acids
pmb3061	Phenolic acids
Lmhn003799	Phenolic acids
mad2394	Phenolic acids
pmb3055	Phenolic acids
Zmhn000785	Phenolic acids
Lmhn003801	Phenolic acids
pmn001547	Phenolic acids
pmn001529	Phenolic acids
Lmgn002250	Phenolic acids
Lmgn002253	Phenolic acids
Zmhn002782	Phenolic acids
Zmhn004114	Phenolic acids
pmn001534	Phenolic acids
pmn001535	Phenolic acids
pmf0426	Phenolic acids
pmn001542	Phenolic acids
pmb0302	Glycerol ester
pmb1574	Glycerol ester
pmb1650	Glycerol ester
pmp001284	Glycerol ester
pmb1562	Glycerol ester
Lmhp011562	Glycerol ester
Lmhp011388	Glycerol ester
Lmhp012042	Glycerol ester
Lmhp112042	Glycerol ester
pmb0296	Glycerol ester
Hmbn005456	Glycerol ester
Hmyn007168	Glycerol ester
Lmhp009773	Glycerol ester
Lmhp009526	Glycerol ester
Lmhp010334	Glycerol ester
Lmhp010573	Glycerol ester
Lmhp008513	Glycerol ester
Lmhp008744	Glycerol ester
Lmhp009190	Glycerol ester
mws0255	Nucleotides and derivatives
pme0257	Nucleotides and derivatives
pme0040	Nucleotides and derivatives
pme0033	Nucleotides and derivatives
mws0847	Nucleotides and derivatives
pme1109	Nucleotides and derivatives
pme0256	Nucleotides and derivatives
pmc0274	Nucleotides and derivatives
pme2801	Nucleotides and derivatives
mws0863	Nucleotides and derivatives
pmb2507	Nucleotides and derivatives
pme1194	Nucleotides and derivatives
pme0264	Nucleotides and derivatives
ML10180524	Nucleotides and derivatives
pme3732	Nucleotides and derivatives
mws0248	Nucleotides and derivatives
mws1715	Nucleotides and derivatives
pme3961	Nucleotides and derivatives
pme1184	Nucleotides and derivatives
pme0230	Nucleotides and derivatives
mws1060	Nucleotides and derivatives
pme1178	Nucleotides and derivatives
mws0668	Nucleotides and derivatives
Lmqp000329	Nucleotides and derivatives
pme1474	Nucleotides and derivatives
pmb0197	Nucleotides and derivatives
pme3967	Nucleotides and derivatives
pme3174	Nucleotides and derivatives
pme3188	Nucleotides and derivatives
mws0884	Nucleotides and derivatives
pme3184	Nucleotides and derivatives
pmc0066	Nucleotides and derivatives
mws0675	Nucleotides and derivatives
pmb0981	Nucleotides and derivatives
pmb0998	Nucleotides and derivatives
pmb0964	Nucleotides and derivatives
pme3337	Nucleotides and derivatives
pme3007	Nucleotides and derivatives
pme2117	Nucleotides and derivatives
Zmfn000481	Nucleotides and derivatives
pmb2922	Nucleotides and derivatives
pmb0530	Nucleotides and derivatives
pme2651	Nucleotides and derivatives
pmb0550	Anthocyanins
pme1398	Anthocyanins
Lmjp001877	Anthocyanins
Lmmp007480	Flavonoid
pmp000571	Flavonoid
pmp000344	Flavonoid
mws0051	Flavonoid
pme0088	Flavonoid
Cmsp008121	Flavonoid
pmp001204	Flavonoid
pmp000001	Flavonoid
mws2627	Flavonoid
Lmjp007790	Flavonoid
Lmzp004885	Flavonoid
pmp000004	Flavonoid
Lmjp005016	Flavonoid
Lmtp004722	Flavonoid
mws0071	Flavonoid
Lmyp004617	Flavonoid
HJN090	Flavonoid
HJN087	Flavonoid
Hmpp003270	Flavonoid
Lmtn002796	Flavonoid
Lmjp003655	Flavonoid
Hmcn001884	Flavonoid
Lmzp002365	Flavonoid
pmp000581	Flavonoid
pmp000587	Flavonoid
HJAP064	Flavonoid
Zmhp005139	Flavonoid
HJAP148	Flavonoid
Lmyp004889	Flavonoid
Lmyp004407	Flavonoid
Lmsn002815	Flavonoid
pmp001079	Flavonoid
Lmyp003599	Flavonoid
Lmyp003500	Flavonoid
Lmyp004022	Flavonoid
Lmyp003348	Flavonoid
Xmyp004678	Flavonoid
Lmyp003857	Flavonoid
mws1068	Flavonols
pme2954	Flavonols
mws0038	Flavonols
Lmdp003808	Flavonols
mws0917	Flavonols
Lmpn007255	Flavonols
pmp001161	Flavonols
pmn001637	Flavonols
pme0321	Flavonols
mws0919	Flavonols
mws4183	Flavonols
mws2186	Flavonols
mws0913	Flavonols
Lmmn004625	Flavonols
Lmmp003767	Flavonols
Lmmp004257	Flavonols
Lmpn006208	Flavonols
Hmcp002539	Flavonols
mws0061	Flavonols
pmp001309	Flavonols
HJAP154	Flavonols
Hmjp003123	Flavonols
Lmyp004444	Flavonols
Hmcp002207	Flavonols
Lmjp002906	Flavonols
Lmmp003271	Flavonols
Lmmp003903	Flavonols
Lmmn003398	Flavonols
pmn001642	Flavonols
Zmsp004363	Flavonols
Hmln002199	Flavonols
Lmmp003817	Flavonols
Lmdp004892	Flavonols
Hmln002189	Flavonols
Hmln002321	Flavonols
pmp000589	Flavonols
Lmmp003306	Flavonols
pme2493	Flavonols
Hmcp001769	Flavonols
pmp001135	Flavonols
mws1290	Flavonols
Lmjp002867	Flavonols
Hmbp001825	Flavonols
Lmjp002596	Flavonols
Lmtp004044	Flavonols
Lmdp004267	Flavonols
Lmyp004052	Flavonols
mws0059	Flavonols
Lmjp002461	Flavonols
pmn001583	Flavonols
Lmyp003349	Flavonols
Lmyp003139	Flavonols
Lmmp002963	Flavonols
Lmmp002463	Flavonols
pma2088	Flavonols
pmp001311	Flavonols
Lmtp003677	Flavonols
pmp001310	Flavonols
Hmln001836	Flavonols
Lmmp003266	Flavonols
Hmcp001629	Flavonols
pmb0706	Flavonols
Lmmp002995	Flavonols
pmb0709	Flavonols
mws1035	Flavonols
HJAP061	Flavonols
Hmcp001618	Flavonols
pmp001105	Flavonols
Lmpp003268	Flavonols
Lmyp003588	Flavonols
Hmdp001794	Flavonols
pmp001313	Flavonols
pme3285	Flavanols
mws0054	Flavanols
pme0460	Flavanols
Lmmp003109	Flavanols
mws0042	Flavanols
mws0049	Flavanols
mws1397	Flavanols
mws0355	Flavanols
pmn001417	Flavanols
pmn001416	Flavanols
HJN041	Flavanols
mws0034	Flavanols
mws0351	Flavanols
pmb3114	Flavanols
Lmmp000897	Flavanols
pmb2947	Flavanols
Wmhn001575	Quinones
Lmdn004267	Lignans
mws0097	Lignans
pmn001663	Lignans
pmn001378	Lignans
Lmmn002274	Lignans
HJN083	Lignans
pmn001375	Lignans
ML10171848	Others
mws0851	Others
Hmyp002315	Others
Hmdn001963	Others
Hmln002835	Others
pmp001045	Others
pmn001423	Others
HJN055	Others
pmp001264	Sphingolipids
pmb0862	LPC
pmd0130	LPC
pmb2260	LPC
pmb2319	LPC
pmb0863	LPC
Lmhp008833	LPC
pmb0855	LPC
pmd0132	LPC
Lmhp008718	LPC
Lmhp009590	LPC
pmb2406	LPC
Hmqp006235	LPC
pmb0854	LPC
pmb0865	LPC
pmp001273	LPC
pmp001251	LPC
Lmhp010190	LPC
pmp001281	LPC
mws0126	LPC
pmd0136	LPC
Lmhp007840	LPC
Lmhp007598	LPC
Lmhp010908	LPC
Lmhp009890	LPC
pmd0146	LPC
pmd0147	LPC
Lmhp008337	LPE
Lmhp008885	LPE
Lmhp008763	LPE
pmd0160	LPE
pmb0876	LPE
Lmhp008801	LPE
Lmhp008589	LPE
pmb0881	LPE
pmb0874	LPE
pmb0856	LPE
pmb0883	LPE
Lmhp010757	LPE
mws0024	Tannin
pme0309	Tannin
pme0310	Tannin
pme2246	Tannin
pmn001513	Tannin
Hmln000659	Tannin
pmn001519	Tannin
Cmsn000894	Tannin
Zmhn006373	Tannin
Lmsn002494	Tannin
Hmln003405	Tannin
Hmdn001667	Tannin
Wmhn001495	Tannin
Hmlp001270	Tannin
Cmsn001563	Tannin
pmp000273	Tannin
Lmcn003163	Tannin
Lmhn002379	Tannin
Wmhn003138	Tannin
Lmsn002110	Tannin
Zmhn003541	Tannin
Hmqn003212	Tannin
Lmfn001769	Tannin
Lmfn001209	Tannin
Hmdp001663	Tannin
Cmhn000855	Tannin
Hmln001302	Tannin
Lmsn001090	Tannin
Lmsn001369	Tannin
Zmhp004555	Tannin
Hmqn002062	Tannin
Lmsn002071	Tannin
Cmhn002756	Tannin
Hmdp001587	Tannin
Hmqn003158	Tannin
Hmqn001732	Tannin
pmp000100	Tannin
Cmhn002124	Tannin
Hmqn002738	Tannin
pmn001636	Tannin
Cmhn001843	Tannin
Hmqn003706	Tannin
pmp000103	Tannin
pmp000102	Tannin
mws4053	Triterpene
pmn001700	Triterpene
Hmbp007740	Triterpene
pmn001704	Triterpene
Lmzn006582	Triterpene
mws1610	Triterpene
Zmpn008194	Triterpene
HJN106	Triterpene
pmp000268	Triterpene
Li512114	Triterpene
Zmpn006881	Triterpene
pmn001708	Triterpene
Hmjn003948	Triterpene
pmp000269	Triterpene
pmp000271	Triterpene
Hmjp003546	Triterpene
Hmln003605	Triterpene
pmp000781	Triterpene
pmp000782	Triterpene
pmp000780	Triterpene
Hmmp006067	Triterpene Saponin
mws0191	Alkaloids
pmp001198	Alkaloids
pmb0374	Alkaloids
HJKP000649	Alkaloids
pme2268	Alkaloids
Lmtn001630	Alkaloids
pmb1912	Alkaloids
Lmtn001569	Alkaloids
pmp001274	Alkaloids
pmp001275	Alkaloids
pma0134	Saccharides and Alcohols
mws0889	Saccharides and Alcohols
Zmgn000173	Saccharides and Alcohols
mws1499	Saccharides and Alcohols
mws0437	Saccharides and Alcohols
mws0213	Saccharides and Alcohols
pme2529	Saccharides and Alcohols
pme2435	Saccharides and Alcohols
Zmzn000078	Saccharides and Alcohols
mws4175	Saccharides and Alcohols
pme2253	Saccharides and Alcohols
pmb0786	Saccharides and Alcohols
mws4170	Saccharides and Alcohols
pme0516	Saccharides and Alcohols
mws1164	Saccharides and Alcohols
mws1155	Saccharides and Alcohols
pme2237	Saccharides and Alcohols
mws0214	Saccharides and Alcohols
Zmgn000447	Saccharides and Alcohols
pme3705	Saccharides and Alcohols
pme0534	Saccharides and Alcohols
Zmzn000079	Saccharides and Alcohols
pme1261	Saccharides and Alcohols
Zmpn000199	Saccharides and Alcohols
Zmyn000108	Saccharides and Alcohols
Hmcn000192	Saccharides and Alcohols
mws4174	Saccharides and Alcohols
mws2608	Saccharides and Alcohols
pme2755	Saccharides and Alcohols
Zmyn000110	Saccharides and Alcohols
mws0866	Saccharides and Alcohols
mws1090	Saccharides and Alcohols
pme3313	Saccharides and Alcohols
Zmpn000095	Saccharides and Alcohols
pmb3081	Saccharides and Alcohols
pme3163	Saccharides and Alcohols
pme3311	Saccharides and Alcohols
Zmyn000083	Saccharides and Alcohols
MA10039641	Saccharides and Alcohols
pme0519	Saccharides and Alcohols
Zmjn000425	Saccharides and Alcohols
mws5040	Saccharides and Alcohols
mws2523	Saccharides and Alcohols
pme2125	Saccharides and Alcohols
mws1589	Saccharides and Alcohols
pmb2653	Saccharides and Alcohols
mws0133	Vitamin
pme0490	Vitamin
Zmjp000624	Vitamin
pme1383	Vitamin
MA10039492	Vitamin
pme2596	Vitamin
mws1337	Vitamin
pme2266	Vitamin
pma3101	Vitamin
pmb0789	Vitamin
mws0232	Vitamin
mws1012	Coumarins
mws0987	Coumarins
Hmjp002337	Coumarins
Cmpp003619	Coumarins
Zmjn003263	Coumarins
pme2993	Coumarins
mws1014	Coumarins
Cmpp007319	Coumarins
pmb2601	Coumarins
Lmbp003825	Coumarins
pmb0382	Coumarins
pmb4777	Coumarins
mws1015	Coumarins
Lmbn001162	Coumarins
Lmgp003270	Coumarins
pma0104	Coumarins
pmp000364	Coumarins
Lmbp002255	Coumarins
pmb2723	Coumarins
mws0918	Isoflavones
Lmgn002843	Isoflavones
pmp001169	Isoflavones
Lmhp003217	Isoflavones
pmb1096	Plumerane
pmb0812	Plumerane
mws0103	Plumerane
mws0005	Plumerane
mws0102	Plumerane
mws1417	Plumerane
pme1651	Plumerane
pmb0312	Plumerane
pmb0818	Plumerane
Wmmn002441	Free fatty acids
mws0752	Free fatty acids
Zmgn003633	Free fatty acids
mws5045	Free fatty acids
Zmjn003398	Free fatty acids
mws0119	Free fatty acids
mws0359	Free fatty acids
mws0361	Free fatty acids
Hmsn000210	Free fatty acids
mws0383	Free fatty acids
pmf0293	Free fatty acids
mws0367	Free fatty acids
pmb0889	Free fatty acids
Lmbn005923	Free fatty acids
mws0366	Free fatty acids
Lmbn006152	Free fatty acids
mws1491	Free fatty acids
YC512118	Free fatty acids
mws0396	Free fatty acids
mws2623	Free fatty acids
mws1489	Free fatty acids
pmn001686	Free fatty acids
Zmyn004548	Free fatty acids
Lmbn005443	Free fatty acids
Zmpn003368	Free fatty acids
pmb2792	Free fatty acids
pmb2787	Free fatty acids
pmb2799	Free fatty acids
Rfmb091	Free fatty acids
Zmyn004714	Free fatty acids
pmf0297	Free fatty acids
Zmyn005015	Free fatty acids
Zmyn005384	Free fatty acids
Lmqn008288	Free fatty acids
pmn001610	Free fatty acids
pmb2791	Free fatty acids
pmb2789	Free fatty acids
pmn001606	Free fatty acids
Rfmb087	Free fatty acids
Lmbn005287	Free fatty acids
Lmbn004685	Free fatty acids
pmb2804	Free fatty acids
pmn001689	Free fatty acids
Zmjn004133	Free fatty acids
Lmbn005822	Free fatty acids
Lmbn005487	Free fatty acids
pmn001691	Free fatty acids
mws0371	Free fatty acids
pmn001694	Free fatty acids
Lmbn003970	Free fatty acids
Lmbn004240	Free fatty acids
pmp001276	Free fatty acids
pmp001271	Free fatty acids
pme1974	Organic acids
pme2601	Organic acids
Lmqp000873	Organic acids
Lmgn000219	Organic acids
pme3011	Organic acids
Lmbn000193	Organic acids
mws0576	Organic acids
pme1975	Organic acids
mws0376	Organic acids
mws0823	Organic acids
pme0275	Organic acids
mws0470	Organic acids
pme1730	Organic acids
mws0192	Organic acids
mws0147	Organic acids
pme3096	Organic acids
mws0671	Organic acids
Lmgp002593	Organic acids
Lmbp000668	Organic acids
pme1216	Organic acids
mws0425	Organic acids
Zmpn000638	Organic acids
Lmbn001364	Organic acids
pme0243	Organic acids
Lmbn001288	Organic acids
mws0972	Organic acids
Lmrn002746	Organic acids
Lmbn000198	Organic acids
mws0275	Organic acids
Zmgn000503	Organic acids
Lmbn002862	Organic acids
mws0336	Organic acids
pme3207	Organic acids
pme0295	Organic acids
mws0567	Organic acids
Lmgn000224	Organic acids
pme2380	Organic acids
mws0924	Organic acids
mws0208	Organic acids
Lmbn001676	Organic acids
Zmyn000247	Organic acids
Lmbn000216	Organic acids
mws0262	Organic acids
mws0639	Organic acids
pmb3099	Organic acids
Lmbn001467	Organic acids
pme2589	Organic acids
pme2761	Organic acids
Lmmn001643	Organic acids
mws0159	Organic acids
pme0282	Organic acids
mws0344	Organic acids
Lmrn003000	Organic acids
mws2125	Organic acids
pme3186	Organic acids
Xmbp001692	Organic acids
ML10176345	Organic acids
Lmbn003524	Organic acids
Zmgn004439	Organic acids
pme2550	Organic acids
pme3009	Organic acids
mws0154	Organic acids
Lmgn002555	Organic acids
mws0242	Organic acids
Zmgn001448	Organic acids
pmb3101	Organic acids
Lmbn001754	Organic acids
mws0237	Organic acids
mws0281	Organic acids
Zmyn000453	Organic acids
mws0277	Organic acids
mws1189	Organic acids
pmb2640	Organic acids
pme0266	Organic acids
Zmtn001464	Organic acids
pme1654	Organic acids
Lmmn003323	Organic acids
pmb2657	Organic acids
pme0436	Proanthocyanidins
mws0836	Proanthocyanidins
pme0434	Proanthocyanidins
pmn001667	Proanthocyanidins
Lmhn002727	Proanthocyanidins
HJN094	Proanthocyanidins
pmn001646	Proanthocyanidins
pmn001647	Proanthocyanidins
HJAP144	Proanthocyanidins
