# Supplementary material for: Transcriptomic and Metabolomic Changes Triggered by Macrosiphum Rosivorum in Rose (Rosa longicuspis)
Source: Research Square preprint supplement (doi:10.21203/rs.3.rs-828971/v1), 2021-09-01
Supplement: Supplementary file 4 [file cea73332f592dc400e09c0c1.xls]

KEGG_A_class	KEGG_B_class	Pathway	A3d-vs-A5d (10)	All (283)	Pvalue	Qvalue	Pathway ID	Metabolites	C_IDs
Metabolism	Lipid metabolism	alpha-Linolenic acid metabolism	3	8	0.00163511	0.02452665	ko00592	Zmjn003398;mws0367;Zmpn003368	C16308+C06427+C16316
Metabolism	Lipid metabolism	Biosynthesis of unsaturated fatty acids	2	7	0.02151783	0.16138373	ko01040	mws0367;mws0366	C06427+C06426
Metabolism	Metabolism of cofactors and vitamins	Thiamine metabolism	1	3	0.102656	0.38496000	ko00730	Lmqp000329	C03373
Metabolism	Biosynthesis of other secondary metabolites	Anthocyanin biosynthesis	1	3	0.102656	0.38496000	ko00942	pmb0550	C08604
Metabolism	Biosynthesis of other secondary metabolites	Stilbenoid, diarylheptanoid and gingerol biosynthesis	1	4	0.134704	0.40411200	ko00945	mws0178	C00852
Metabolism	Lipid metabolism	Fatty acid biosynthesis	1	5	0.1657182	0.41429550	ko00061	mws0119	C06424
Metabolism	Metabolism of cofactors and vitamins	Pantothenate and CoA biosynthesis	1	8	0.2528517	0.52503881	ko00770	Zmgn000503	C04039
Metabolism	Amino acid metabolism	Arginine and proline metabolism	1	9	0.2800207	0.52503881	ko00330	mws0567	C01035
Metabolism	Nucleotide metabolism	Purine metabolism	1	17	0.4673598	0.63730882	ko00230	Lmqp000329	C03373
Metabolism	Lipid metabolism	Linoleic acid metabolism	1	17	0.4673598	0.63730882	ko00591	mws0366	C06426
Metabolism	Biosynthesis of other secondary metabolites	Phenylpropanoid biosynthesis	1	17	0.4673598	0.63730882	ko00940	mws0178	C00852
Metabolism	Global and overview maps	Biosynthesis of secondary metabolites	4	104	0.5347988	0.64717258	ko01110	Zmjn003398;mws0367;Lmqp000329;mws0178	C16308+C06427+C03373+C00852
Metabolism	Biosynthesis of other secondary metabolites	Flavonoid biosynthesis	1	22	0.5608829	0.64717258	ko00941	mws0178	C00852
Metabolism	Global and overview maps	Metabolic pathways	5	169	0.8332069	0.87891450	ko01100	mws0567;mws0119;mws0367;mws0366;Lmqp000329	C01035+C06424+C06427+C06426+C03373
Metabolism	Global and overview maps	Biosynthesis of antibiotics	1	53	0.8789145	0.87891450	ko01130	Lmqp000329	C03373
